# Supplementary material for: Kinetic, thermodynamic, and ab initio insights of AsnGly isomerisation as a ticking time bomb for protein integrity
Source: PubMed Central journal article supplement — Commun Chem. 2024 Dec 19;7:303. doi: 10.1038/s42004-024-01374-1 (PMC11659308; doi:10.1038/s42004-024-01374-1), 2024-12-19
Supplement: 42004_2024_1374_MOESM3_ESM.pdf [file 42004_2024_1374_MOESM3_ESM.pdf]

# Description of Additional Supplementary Files

**File name: Supplementary Data 1**

**Description:** The <sup>1</sup>H NMR resonance assignment, coupling patterns and coupling constants of the AcNGXA-NH<sub>2</sub> peptides together with the display of spectra.

**File name: Supplementary Data 2**

**Description:** The input parameters, input and output coordinates and absolute energies of the structures used in IRC path calculations and NBO analysis.

**File name: Supplementary Data 3**

**Description:** GnuPlot scripts and the corresponding source data text files.

**File name: Supplementary Data 4**

**Description:** The COPASI inputs and the corresponding data files for the kinetic model calculations.
